# Supplementary material for: Evidence for a Grooming Claw in a North American Adapiform Primate: Implications for Anthropoid Origins
Source: PubMed Central journal article supplement (PMC3254620; doi:10.1371/journal.pone.0029135), 2012-01-10

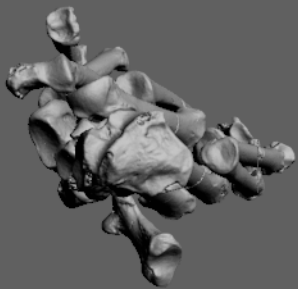

Supplement: pone.0029135.s013.pdf [file pone.0029135.s013.pdf]
