# Supplementary material for: Evidence for a Grooming Claw in a North American Adapiform Primate: Implications for Anthropoid Origins
Source: PLOS journal article supplement (doi:10.1371/journal.pone.0029135), 2012-01-10

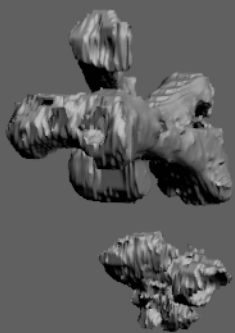

Supplement: S12 (10.1371/journal.pone.0029135.s012) [file journal.pone.0029135.s012]
